# Supplementary material for: Effect of agricultural pesticide on precocious puberty in urban children: an exploratory study
Source: PubMed Central journal article supplement — Clin Exp Pediatr. 2019 Dec 6;63(4):146–50. doi: 10.3345/cep.2019.00416 (PMC7170788; doi:10.3345/cep.2019.00416), 2019-12-06
Supplement: cep-2019-00416-suppl2.pdf [file cep-2019-00416-suppl2.pdf]

**Supplementary material 2. Flow rates and timing for liquid chromatography mass spectrometry conditions**

| Time (min) | Mobile phase |       | Flow (mL/min) |
|------------|--------------|-------|---------------|
|            | A (%)        | B (%) |               |
| Initial    | 85           | 15    | 0.3           |
| 1          | 85           | 15    | 0.3           |
| 1.5        | 40           | 60    | 0.3           |
| 10         | 10           | 90    | 0.3           |
| 12         | 10           | 90    | 0.3           |
| 12.1       | 2            | 98    | 0.3           |
| 16         | 2            | 98    | 0.3           |
| 20         | 85           | 15    | 0.3           |

Mobile A, 0.1% formic acid and 5 mM ammonium formate in water; mobile B, 0.1% formic acid and 5 mM ammonium formate in methanol.
